# Supplementary material for: Comparative Analysis of How the Fecal Microbiota of Green-Winged Saltator (Saltator similis) Diverge among Animals Living in Captivity and in Wild Habitats
Source: MDPI journal article supplement (doi:10.3390/ani14060937), 2024-03-19
Supplement: s1 [file s1]

## List of Supplementary Figures

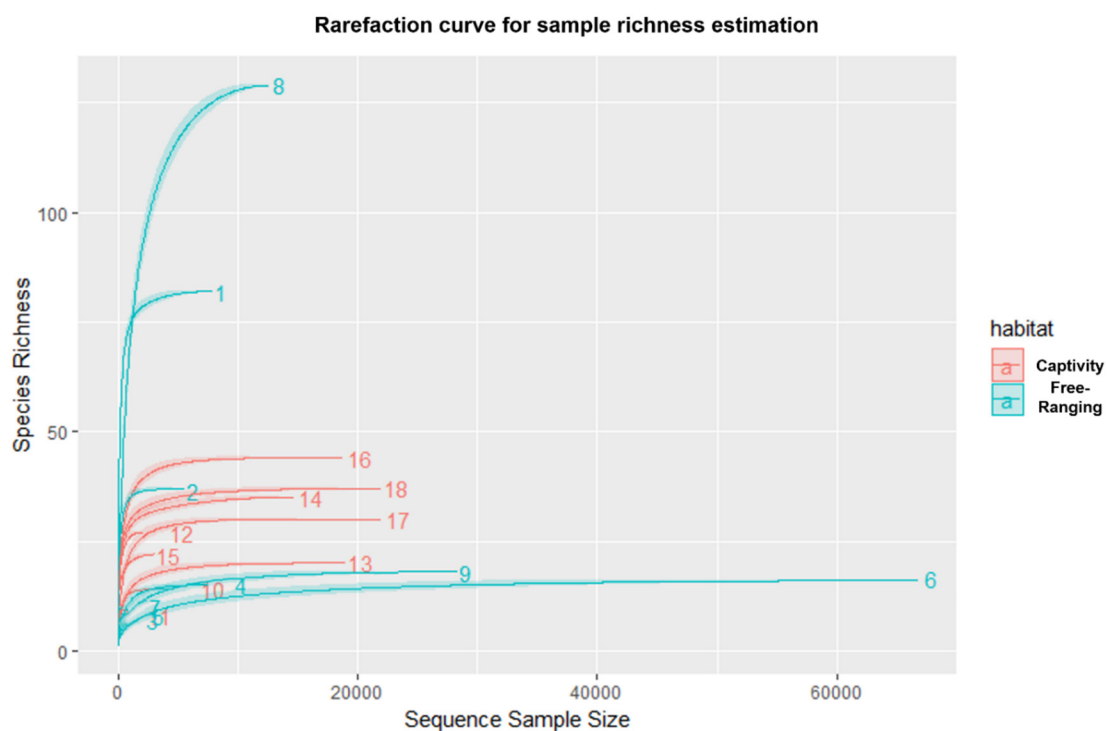

**Supplementary Figure S1** The rarefaction curves of the sequences from *Saltator similis*. The lines represent each one of the sequenced libraries. The turquoise lines represent the libraries from free-ranging *S. similis*, and the pink lines represent libraries from captivity *S. similis*.

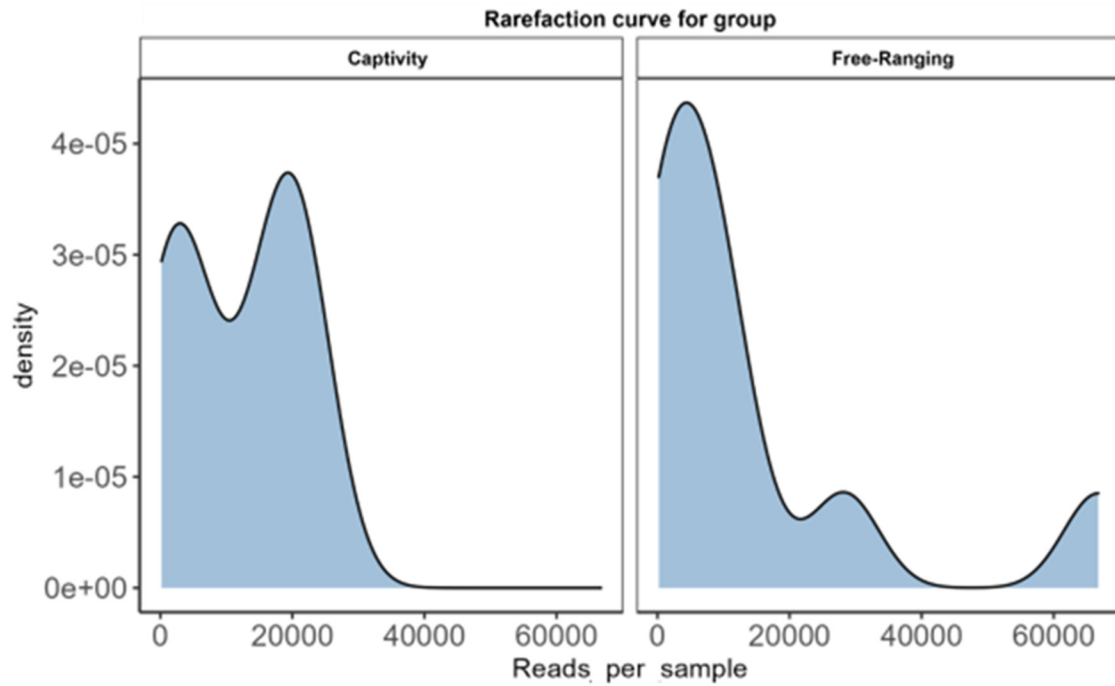

**Supplementary Figure S2** The rarefaction curves of the sequences from *Saltator similis*, per group. Comparison of the identified ASVs with the number of sequenced reads in each group.

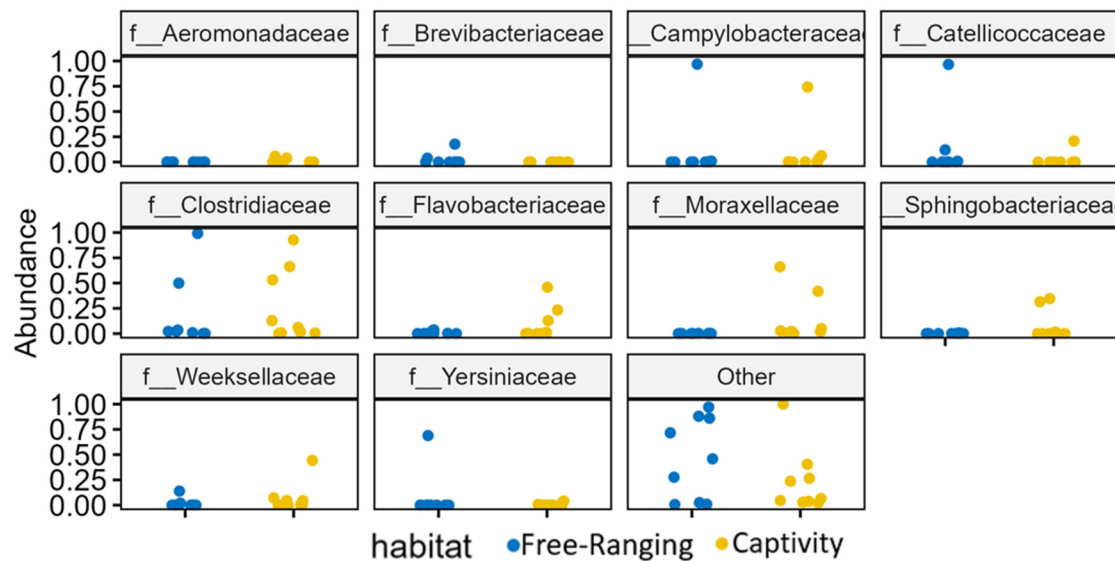

**Supplementary Figure S3** Relative abundance of the principal bacterial families identified in the feces of all studied *Saltator similis*. The points represent the ASVs. Blue color: Free-ranging songbirds. Yellow color: captivity songbirds

|        | Captivity                                                                                                                                                                                                                                                                                | Free-ranging                                                                                                                                                                                                                                               |
|--------|------------------------------------------------------------------------------------------------------------------------------------------------------------------------------------------------------------------------------------------------------------------------------------------|------------------------------------------------------------------------------------------------------------------------------------------------------------------------------------------------------------------------------------------------------------|
| Phyla  | <i>Firmicutes</i><br><i>Bacteroidota</i><br><i>Proteobacterias</i><br><i>Actinobacteriota</i>                                                                                                                                                                                            | <i>Firmicutes</i><br><i>Bacteroidota</i><br><i>Proteobacterias</i><br><i>Actinobacteriota</i>                                                                                                                                                              |
| Family | <i>Weeksellaceae</i><br><i>Micrococcaceae</i><br><i>Lachnospiraceae</i><br><i>Campylobacteriaceae</i><br><i>Clostridiaceae</i><br><i>Catelliococcaceae</i><br><i>Moraxellaceae</i><br><b><i>Sphingobacteriaceae</i>*</b><br><b><i>Flavobacteriaceae</i>*</b>                             | <i>Weeksellaceae</i><br><i>Micrococcaceae</i><br><i>Lachnospiraceae</i><br><i>Campylobacteriaceae</i><br><i>Clostridiaceae</i><br><i>Catelliococcaceae</i><br><i>Moraxellaceae</i><br><b><i>Mycoplasmataceae</i>*</b><br><b><i>Corynebacteriaceae</i>*</b> |
| Genera | <i>Anaerosporobacter</i><br><i>Campylobacter</i><br><b><i>Aeromonas</i>*</b><br><b><i>Acinetobacter</i>*</b><br><b><i>Empedobacter</i>*</b><br><b><i>Flavobacterium</i>*</b><br><b><i>"Candidatus Arthromitus"</i>*</b><br><b><i>Sphingobacterium</i>*</b><br><b><i>Acidibacter</i>*</b> | <i>Anaerosporobacter</i><br><i>Campylobacter</i><br><b><i>Catelliococcus</i>*</b><br><b><i>Actinobacillus</i>*</b><br><b><i>Brevibacterium</i>*</b><br><b><i>Clostridium sensu stricto 1</i>*</b><br><b><i>Serratia</i>*</b><br><b><i>Mycoplasma</i>*</b>  |

**Supplementary Figure S4** The most predominant phyla, family, and genera identified in the feces from captivity and free-ranging *Saltator similis*. Bold \*: Indicates family or genus identified in libraries from a single habitat. Results from RStudio using packages Vegan and the function Adonis and Adonis2.
